# Supplementary material for: Poly(lactide-co-glycolide) grafted hyaluronic acid-based electrospun fibrous hemostatic fragments as a sustainable anti-infection and immunoregulation material
Source: Royal Society of Chemistry journal article supplement (doi:10.1039/c9tb00659a), 2019-01-01
Supplement: c9tb00659a1.pdf [file c9tb00659a1.pdf]

### Supporting information

Poly(lactide-co-glycolide) grafted hyaluronic acid based electrospun fibrous  
hemostatic fragments for sustainable anti-infection and immunoregulation

Wen Liu<sup>#, 1, 2, 3</sup>, Guanghui Xi<sup>#, 1, 2, 3</sup>, Xiao Yang<sup>1, 2, 3, 4</sup>, Xiao Hao<sup>5</sup>, Mingshan Wang<sup>6</sup>,

Yakai Feng<sup>\*, 1, 2, 3, 4</sup>, Hao Chen<sup>\*, 1, 2, 3</sup>, Changcan Shi<sup>\*, 1, 2, 3</sup>

<sup>1</sup> School of Ophthalmology & Optometry, Eye Hospital, School of Biomedical Engineering, Wenzhou Medical University, Wenzhou, Zhejiang 325027, China

<sup>2</sup> Wenzhou Institute of Biomaterials and Engineering, Wenzhou Institute, University of Chinese Academy of Sciences, Wenzhou, Zhejiang 325011, China

<sup>3</sup> Engineering Research Center of Clinical Functional Materials and Diagnosis & Treatment Devices of Zhejiang Province, Wenzhou Institute of Biomaterials and Engineering, Wenzhou, Zhejiang 325011 China

<sup>4</sup> School of Chemical Engineering and Technology, Tianjin University, Tianjin 300350, China

<sup>5</sup> Hebei General Hospital, Shijiazhuang, Hebei 050051, China

<sup>6</sup> The First Affiliated Hospital of Wenzhou Medical University, Wenzhou Medical University, Wenzhou, Zhejiang 325000, China

<sup>#</sup> Wen Liu and Guanghui Xi contributed equally to this work

Corresponding authors:

Prof., Ph. D., Yakai Feng

School of Chemical Engineering and Technology, Tianjin University, China

E-mail: [yakaifeng@tju.edu.cn](mailto:yakaifeng@tju.edu.cn)

Prof., M. D., Hao Chen

School of Ophthalmology & Optometry, Eye Hospital, School of Biomedical Engineering, Wenzhou Medical University, China

E-mail: [chenhao@wibe.ac.cn](mailto:chenhao@wibe.ac.cn); Tel: +86-577-88017500

Ph.D., Changcan Shi

Wenzhou Institute of Biomaterials and Engineering, CNITECH, CAS, China

E-mail: [shicc@wibe.ac.cn](mailto:shicc@wibe.ac.cn); Tel: +86-577-88017500

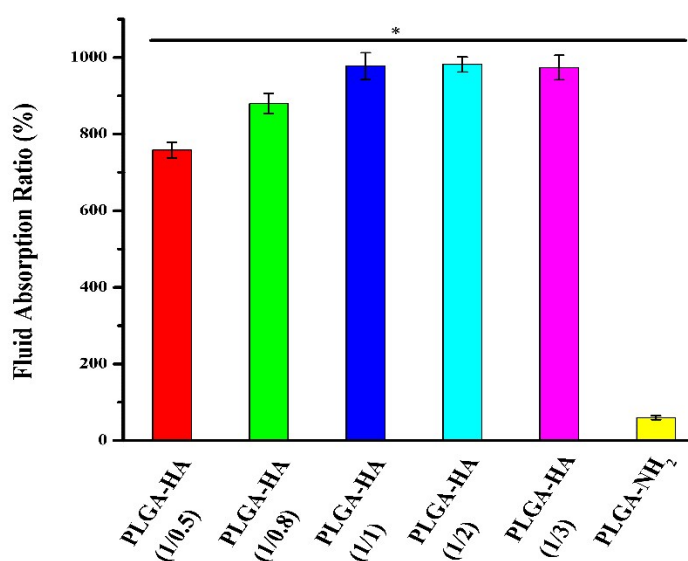

**Figure S1.** Fluid absorption ratio for PLGA-HA FFs with different molar ratio of –NH<sub>2</sub>/HA.
